# Supplementary material
Source: PubMed Central journal article supplement (PMC7197410)
Supplement: NIHMS1582202-supplement-Supplementary_figure.pdf [file NIHMS1582202-supplement-Supplementary_figure.pdf]

Supplementary Fig 1

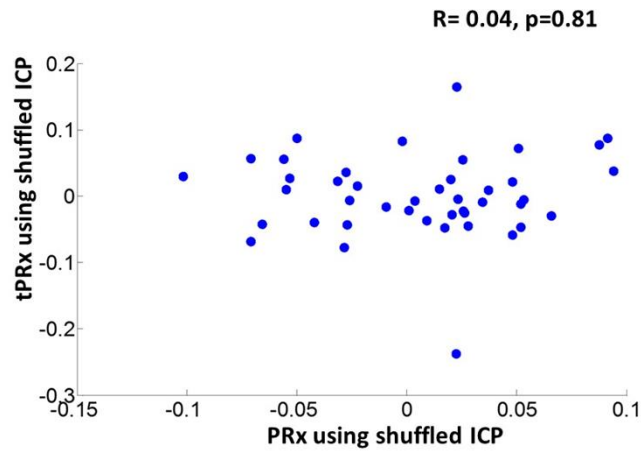

SFig.1. The inter-individual relationship between the ‘artificial’ PRx and tPRx calculated using real ABP, real PTT and randomly shuffled ICP. One dot represents the mean value of one patient); ABP: arterial blood pressure; PTT: pulse transit time; ICP: intracranial pressure; ‘artificial’ PRx, correlation coefficient between slow waves of ABP and shuffled ICP; ‘artificial’ tPRx: correlation coefficient between slow waves of PTT and shuffled ICP.
